# Supplementary material
Source: PubMed Central journal article supplement (PMC2700913)
Supplement: 0812142106_0812142106SI.pdf [file 0812142106_0812142106SI.pdf]

# Supporting Information

Izard et al. 10.1073/pnas.0812142106

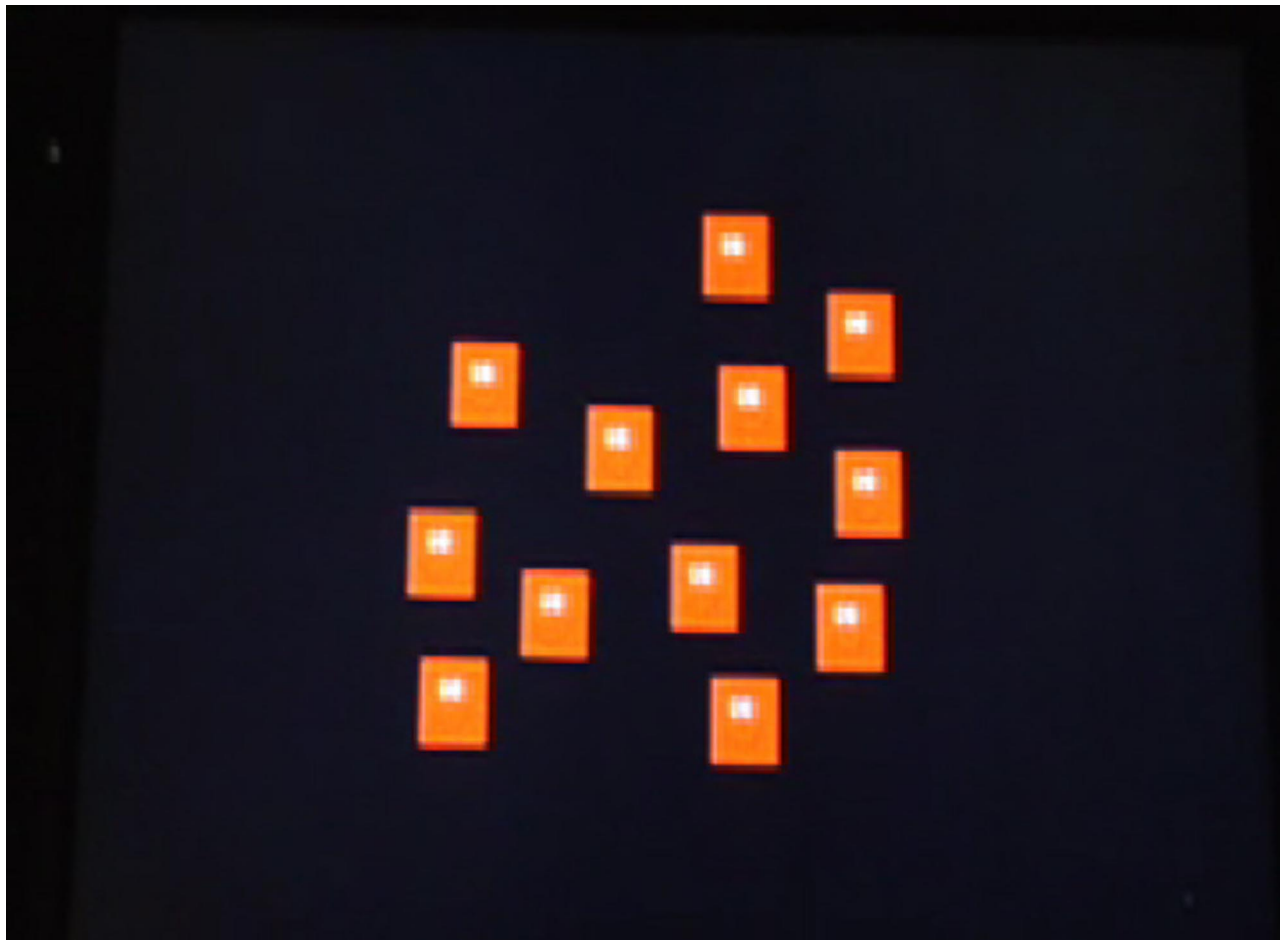

**Movie S1.** This movie shows an example of stimuli used during the test phase. In the real experiment, the test phase was preceded by a familiarization phase where the same auditory sequences were played without visual stimulation. The presentation time of each image could vary depending on the participant's looking behavior.

[Movie S1 \(MOV\)](#)
